# Supplementary material for: Investigation of gene-gene interactions in cardiac traits and serum fatty acid levels in the LURIC Health Study
Source: PLOS journal article supplement (doi:10.1371/journal.pone.0238304), 2020-09-11
Supplement: S9 (10.1371/journal.pone.0238304.s009) [file journal.pone.0238304.s009]

**S1 File. Raw GWAS results for each phenotype.** All 29 raw GWAS results could be accessed at URL:

[https://drive.google.com/drive/folders/12ByaBModrOJW\\_8z2YS\\_V3Zuc5heIgDzJ?usp=sharing](https://drive.google.com/drive/folders/12ByaBModrOJW_8z2YS_V3Zuc5heIgDzJ?usp=sharing).

The explanations for headers could be found at the end of PLATO manuscript at

[https://ritchielab.org/files/RL\\_software/plato-manual-2.1.pdf](https://ritchielab.org/files/RL_software/plato-manual-2.1.pdf).
